# Supplementary material for: Hyperglycemia aggravates acute liver injury by promoting liver‐resident macrophage NLRP3 inflammasome activation via the inhibition of AMPK/mTOR‐mediated autophagy induction
Source: PubMed Central journal article supplement (PMC7004066; doi:10.1111/imcb.12297), 2019-11-19
Supplement: IMCB-98-54-s001.pdf [file IMCB-98-54-s001.pdf]

# Supplementary figure 1

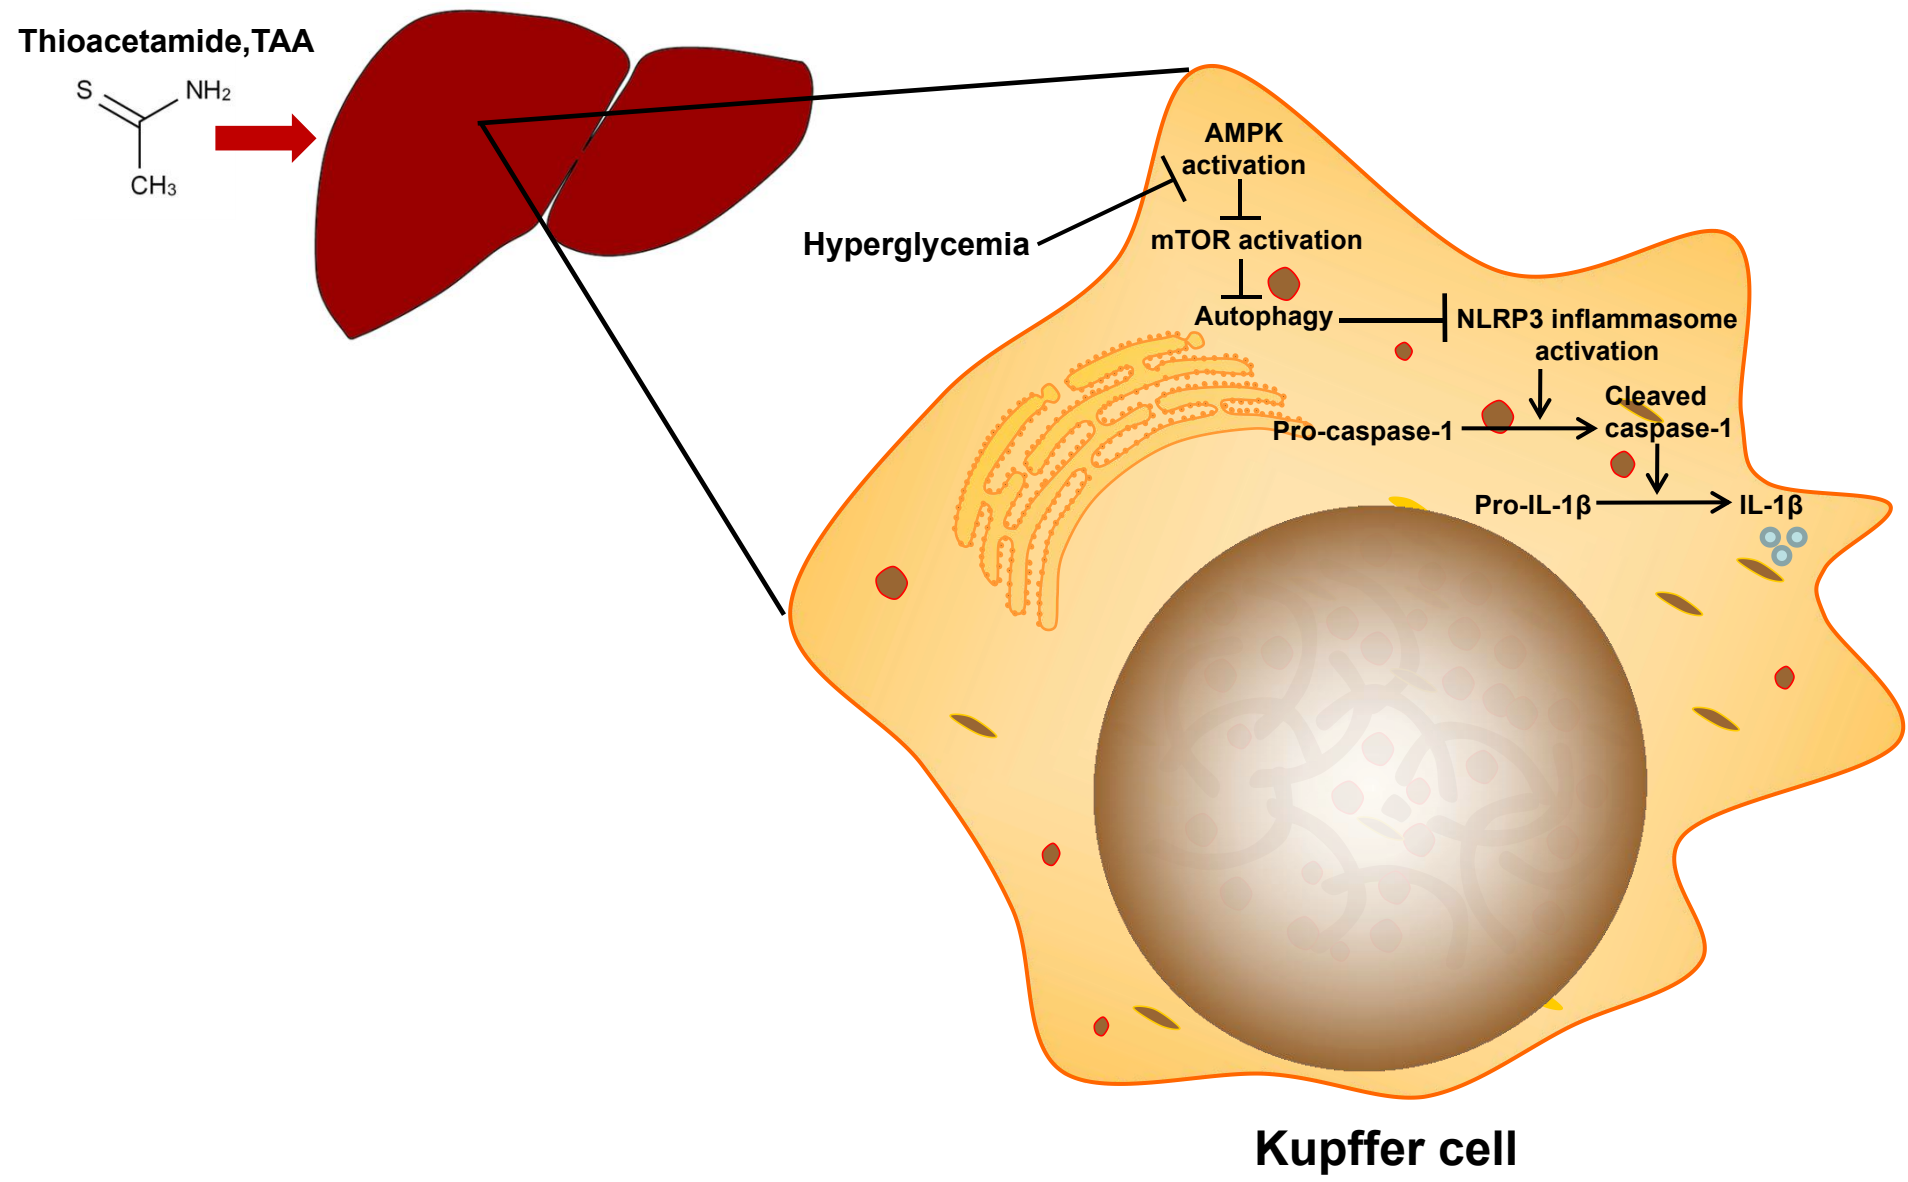

**Supplementary figure 1** We demonstrated that hyperglycemia aggravated TAA-induced acute liver injury by promoting liver-resident macrophage NLRP3 inflammasome activation via inhibiting AMPK/mTOR-mediated autophagy. This study provides a novel target for the prevention of toxin-induced acute liver injury under hyperglycemia.
