# Supplementary material for: Hyperglycemia aggravates acute liver injury by promoting liver‐resident macrophage NLRP3 inflammasome activation via the inhibition of AMPK/mTOR‐mediated autophagy induction
Source: PubMed Central journal article supplement (PMC7004066; doi:10.1111/imcb.12297), 2019-11-19
Supplement: IMCB-98-54-s002.pdf [file IMCB-98-54-s002.pdf]

**Supplementary table 1: Primer sequences for the amplification.**

| Gene         | Forward Primer (5' → 3')    | Reverse Primer (5' → 3')    |
|--------------|-----------------------------|-----------------------------|
| NLRP3        | 5'-ATTACCCGCCCGAGAAAGG-3'   | 5'-TCGCAGCAAAGATCCACACAG-3' |
| IL-1 $\beta$ | 5'-GCAACTGTTCTGAACTCAACT-3' | 5'-ATCTTTTGGGGTCCGTCAACT-3' |
| HPRT         | 5'-TCAGTCAACGGGGGACATAAA-3' | 5'-GGGGCTGTACTGCTTAACCAG-3' |
